# Supplementary material
Source: PubMed Central journal article supplement (PMC7415674)
Supplement: NIHMS1588544-supplement-1.pdf [file NIHMS1588544-supplement-1.pdf]

# Supplementary Fig S1

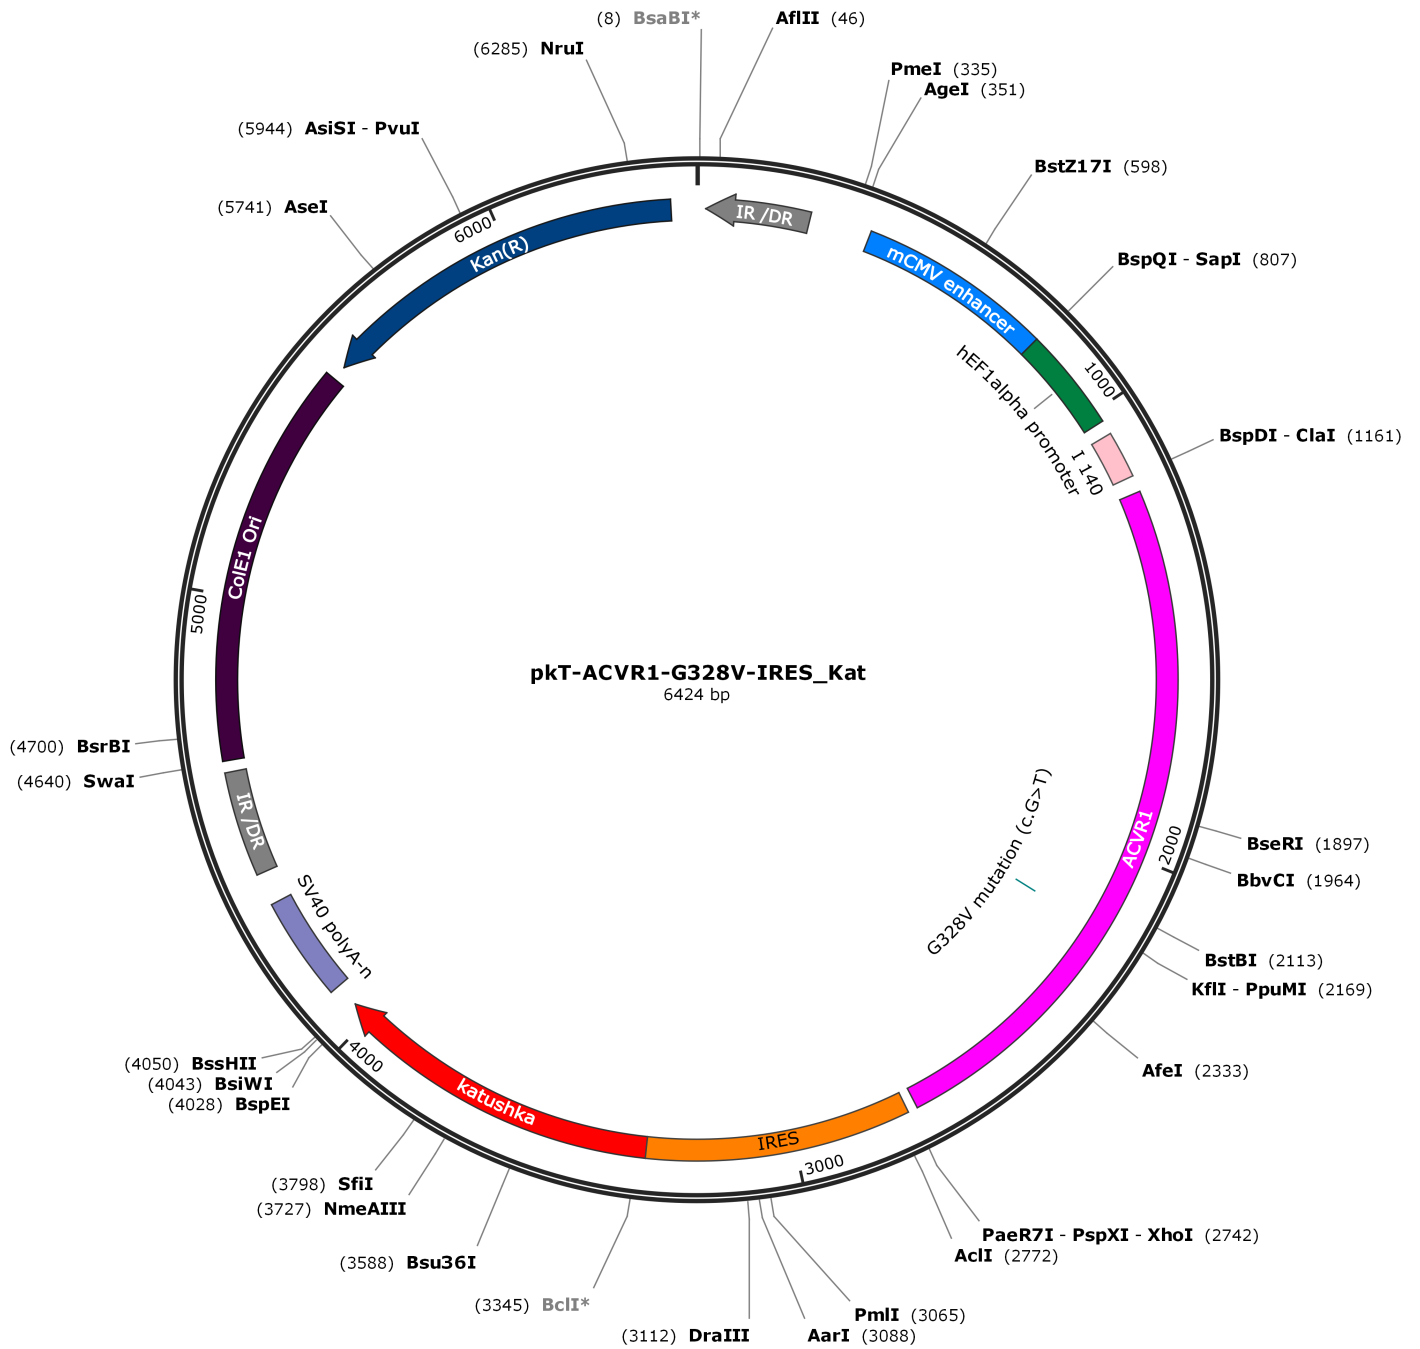

Supplementary Figure S1: cDNA encoding mACVR1 G328V was cloned in between IE/DR sites recognized by Sleeping Beauty.
