# Supplementary material
Source: PubMed Central journal article supplement (PMC7415674)
Supplement: NIHMS1588544-supplement-2.pdf [file NIHMS1588544-supplement-2.pdf]

# Supplementary Fig S2

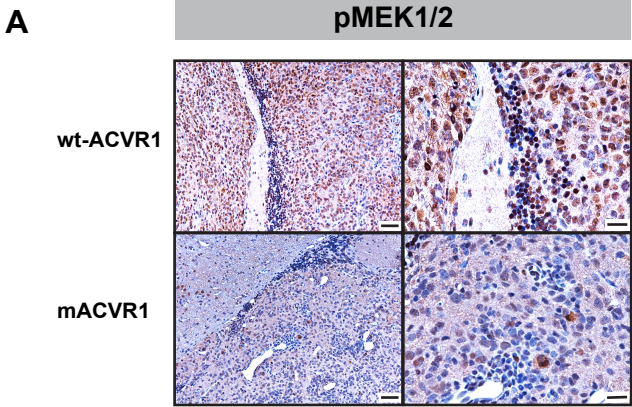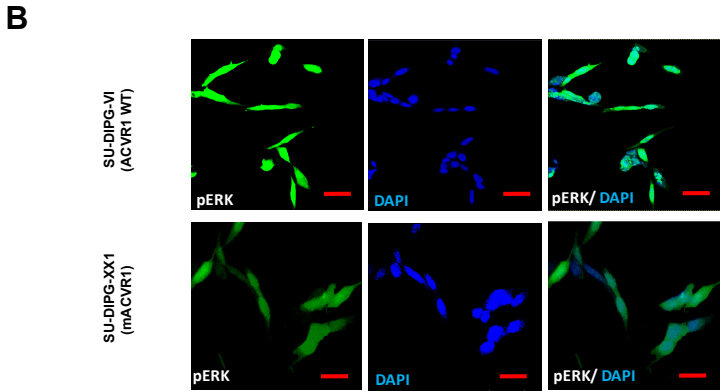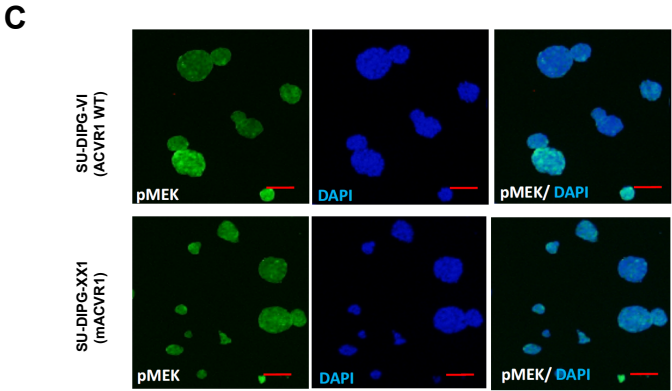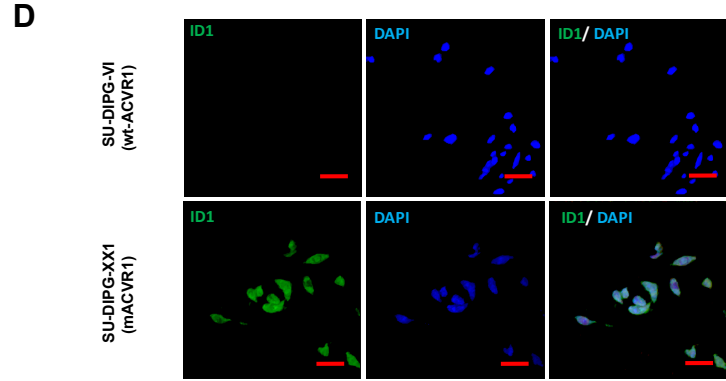

Supplementary Figure S2: (A) Immunohistochemistry (IHC) staining for pMEK1/2 in paraffin embedded SB brainstem tumor sections (wt-ACVR1 and mACVR1). Scale bar on the left panel is 50  $\mu$ m, scale bar for the right panel is 20  $\mu$ m. (B-D) Immunocytochemistry (ICC) staining for pERK1/2 (B) and pMEK1/2 (C) and ID1 (D) on human DIPG cells: SU-DIPG VI (wt-ACVR1) and SU DIPG XX1 (mACVR1). Scale bar = 50  $\mu$ m.
