# Supplementary material
Source: PubMed Central journal article supplement (PMC7415674)
Supplement: NIHMS1588544-supplement-3.pdf [file NIHMS1588544-supplement-3.pdf]

## Supplementary Fig S3

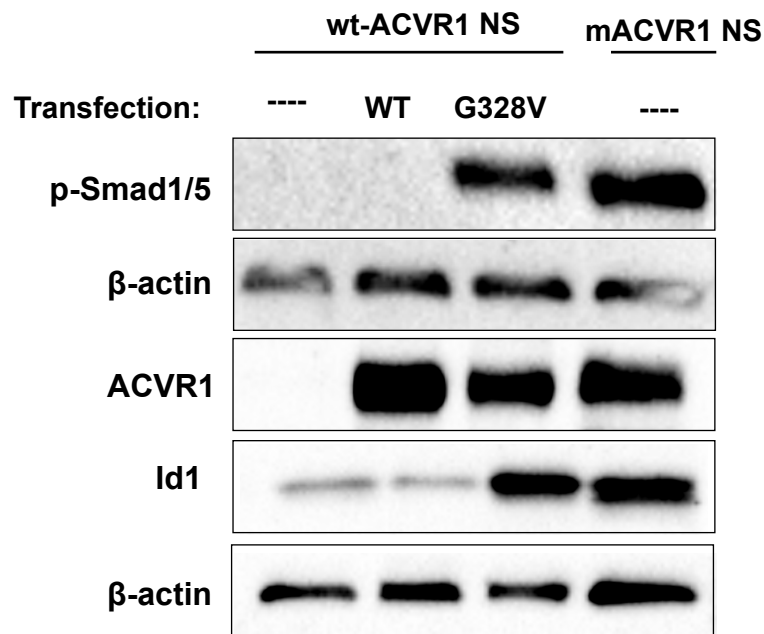

**Supplementary Fig S3:** WB assay was performed on NS from either wt-ACVR1 or mACVR1 NS. Wt-ACVR1 NS were transfected either with wt-ACVR1 or mACVR1 and the protein level of phospho-Smad1/5, ACVR1, and Id1 was assessed.  $\beta$ -actin: loading control.
