# Supplementary material
Source: PubMed Central journal article supplement (PMC7415674)
Supplement: NIHMS1588544-supplement-4.pdf [file NIHMS1588544-supplement-4.pdf]

# Supplementary Figure S4

mACVR1 NS  
implantation to pons

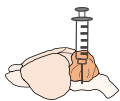

Day: 0 → Histology analysis

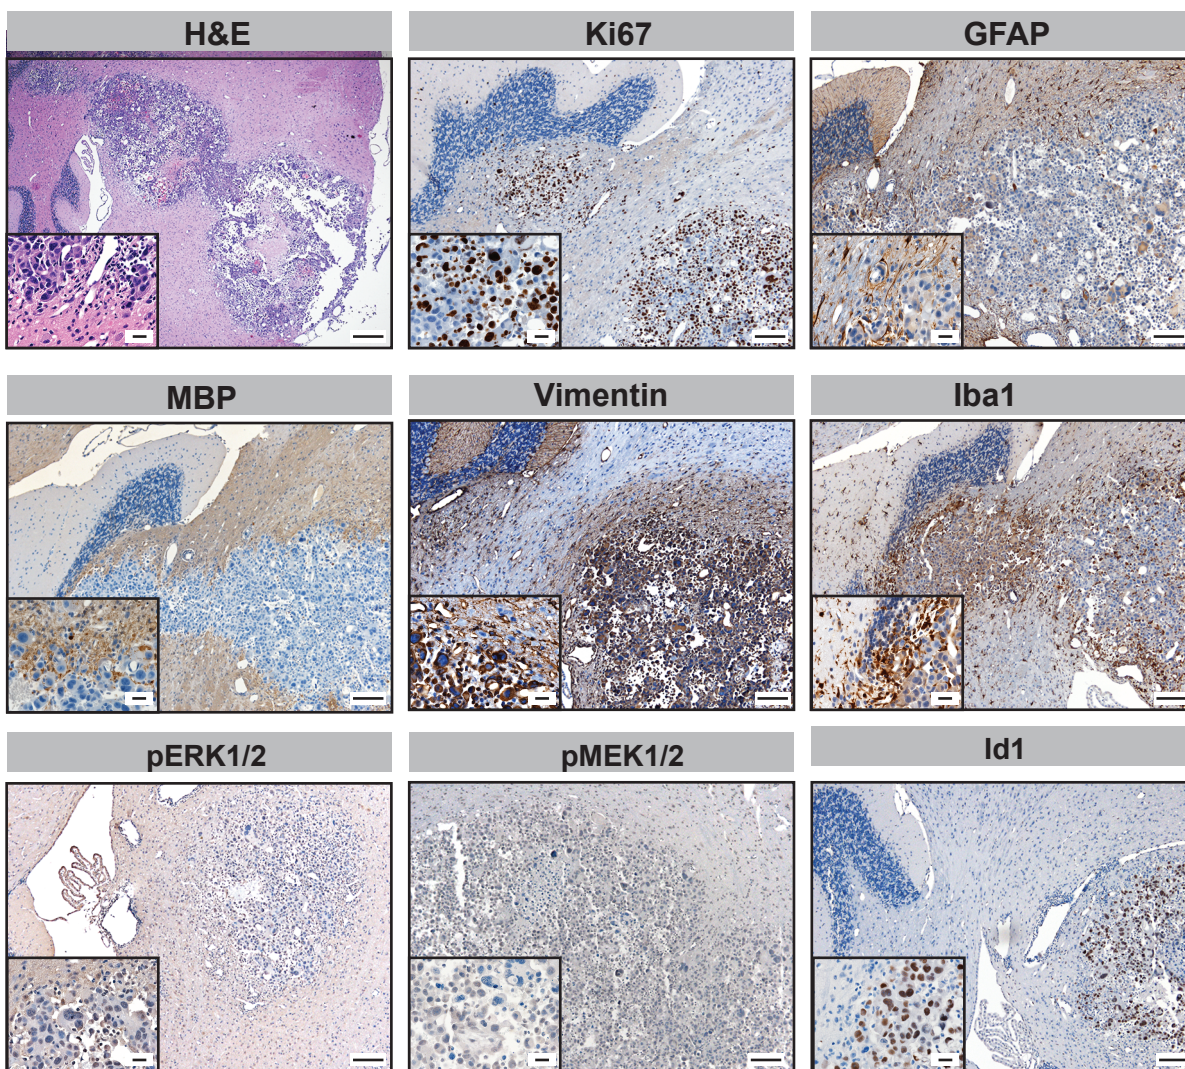

**Supplementary Figure S4:** Mice bearing mACVR1 intracranial brainstem gliomas were processed for histological analysis when they displayed signs of tumor burden. Paraffin embedded mACVR1 tumor sections were stained with Hematoxylin and Eosin (H&E), Ki67 (proliferating cells), GFAP (astrocytes), MBP (myelin sheaths and oligodendrocytes), Vimentin (ependymal cells and astrocytes), Iba1 (microglia), pERK1/2, pMEK1/2, or Id1. Scale bar = 200  $\mu$ m for the H&E. Scale bar = 100  $\mu$ m for the immunostains. Scale bar for all magnified insets = 20  $\mu$ m.
