# Supplementary material
Source: PubMed Central journal article supplement (PMC7415674)
Supplement: NIHMS1588544-supplement-5.pdf [file NIHMS1588544-supplement-5.pdf]

# Supplementary Fig S5

## A Experimental design

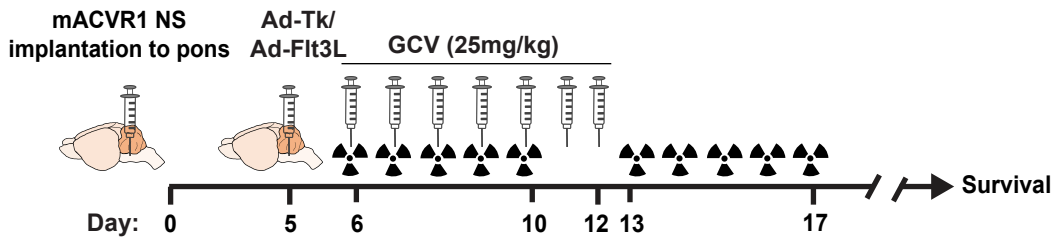

## B Kaplan Meier Survival curves of mACVR1 brainstem glioma bearing mice treated with TK/Flt3L +/- radiation

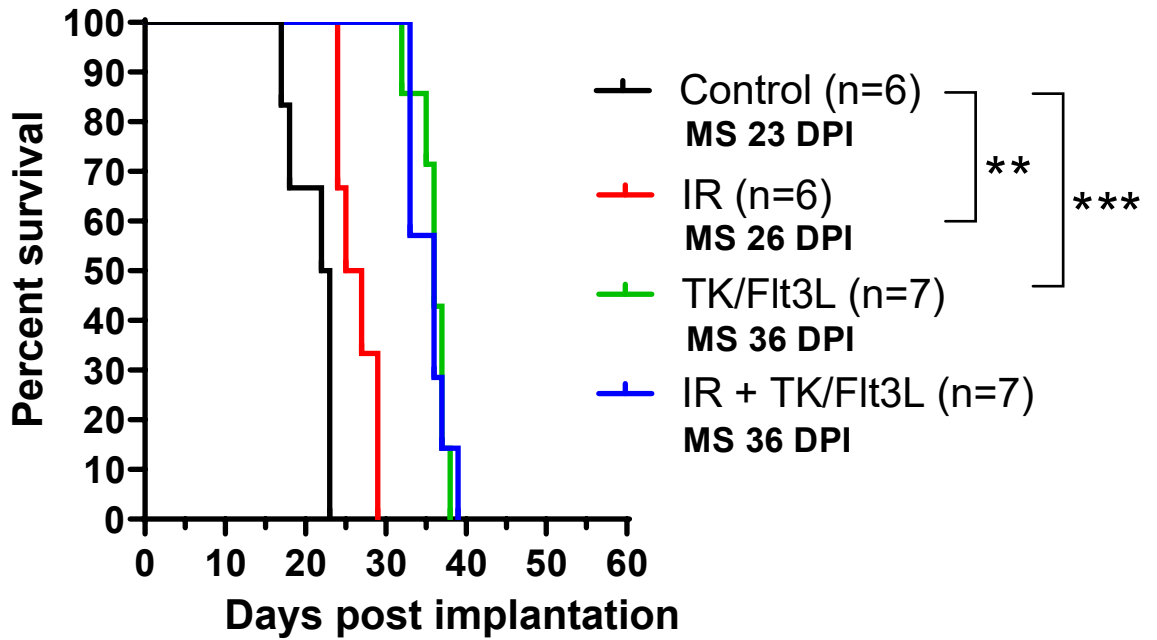

| Group                   | % increased survival | p value |
|-------------------------|----------------------|---------|
| IR vs. saline           | 15.6                 | 0.0011  |
| TK/Flt3L vs. saline     | 60                   | 0.0005  |
| TK/Flt3L+ IR vs. saline | 60                   | 0.0005  |

**Supplementary Figure S5:** (A) Experimental design showing mice bearing mACVR1 brainstem gliomas treated with saline or TK/Flt3L gene therapy on day 5 post tumor implantation, followed by intraperitoneal administration of GCV (25 mg/kg) on day 6-12. Radiation was administered at a dose of 2Gy/Day for 10 days (total = 20 Gy) 5 days' post tumor implantation; mice were monitored for survival. (B) Kaplan Meier survival analysis for mice bearing mACVR1 tumors treated with saline (n = 6), IR (n = 6), TK/Flt3L+ GCV (n=7), or IR+TK/Flt3L+GCV (n=7). Data were analyzed using log-rank (Mantel-Cox) test; \*\* p < 0.01; \*\*\* p < 0.001.
