# Supplementary material
Source: PubMed Central journal article supplement (PMC7415674)
Supplement: NIHMS1588544-supplement-7.pdf [file NIHMS1588544-supplement-7.pdf]

## Supplementary Fig S7

### Neuropathology Toxicity Assessment

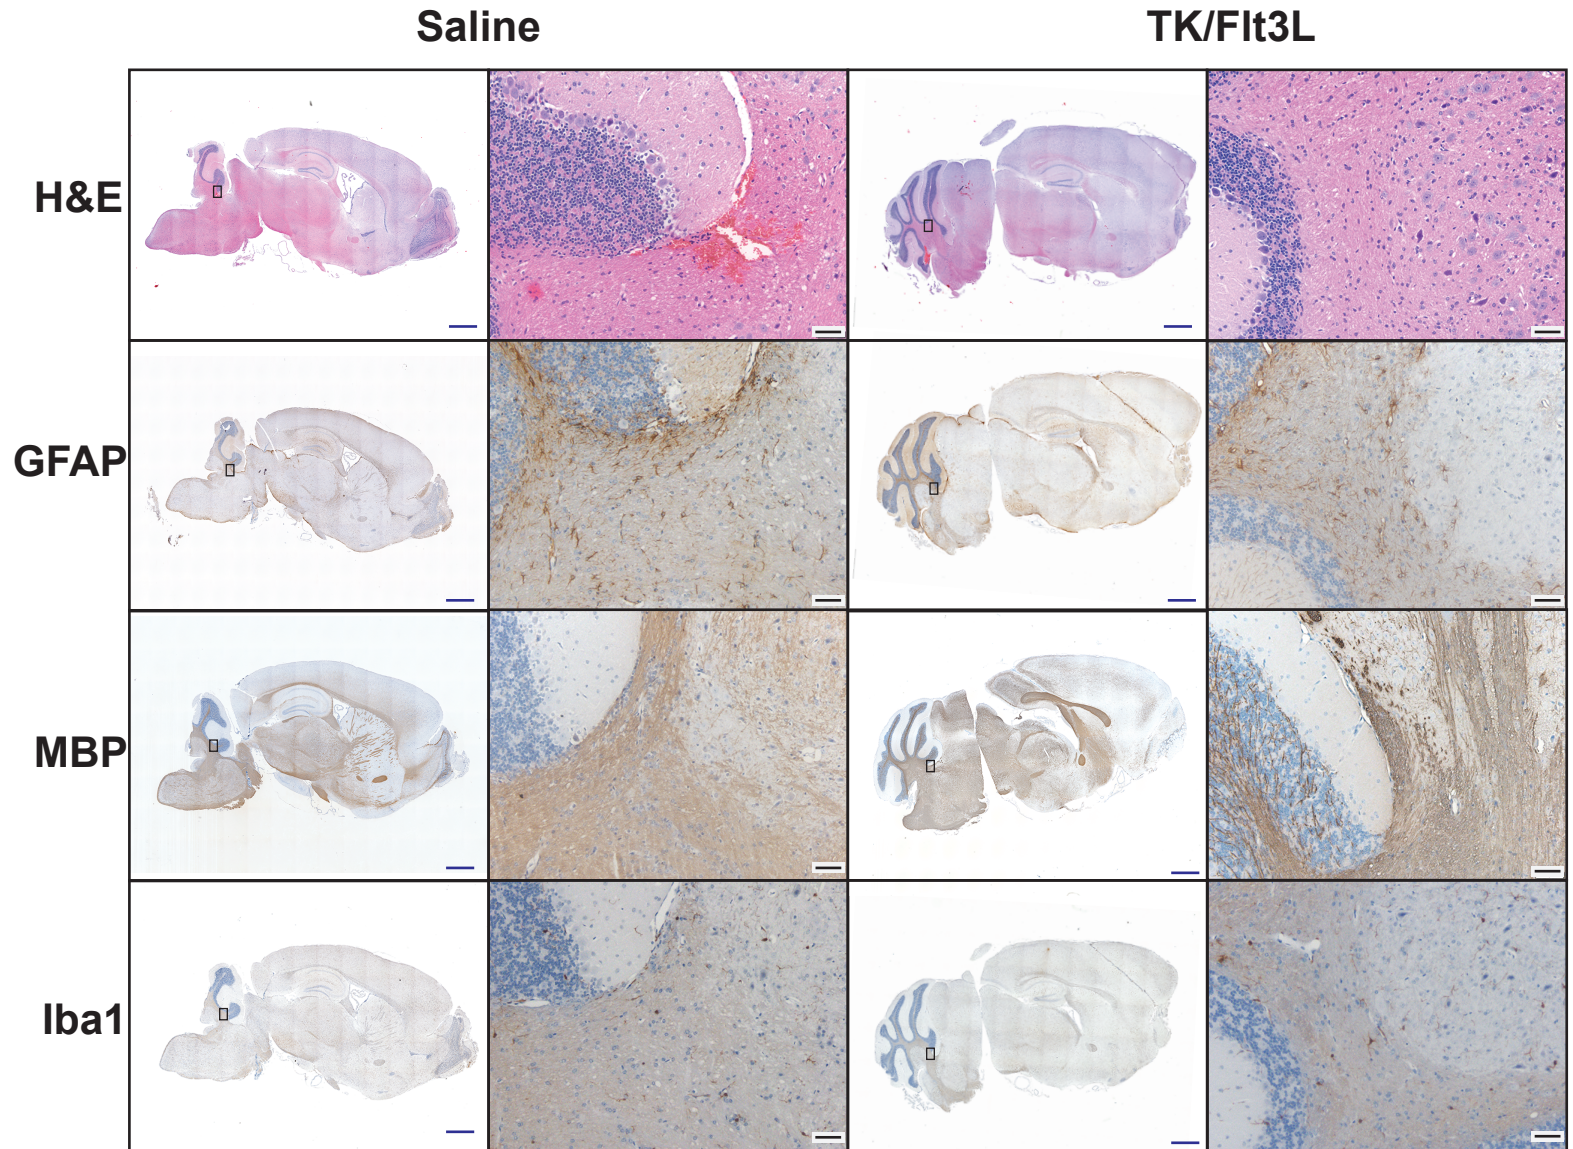

**Supplementary Figure S7:** Local toxicity of adenoviral delivery of TK/Flt3L into normal brainstem. Mice were injected in the pons with Ad-TK and Ad-Flt3L, or saline. GCV was administered intraperitoneally 24 h post vector delivery for 7 days. 24 h after the last dose of GCV was administered neuropathological analysis of the brain was assessed by H&E staining and immunostaining for GFAP (astrocytes), MBP (myelin sheaths, oligodendrocytes), and Iba1 (microglia). Black box represents magnified area. Blue scale bar = 1 mm. Black scale bar = 50  $\mu$ m.
