# Supplementary material
Source: PubMed Central journal article supplement (PMC7415674)
Supplement: NIHMS1588544-supplement-8.pdf [file NIHMS1588544-supplement-8.pdf]

## Supplementary Fig S8

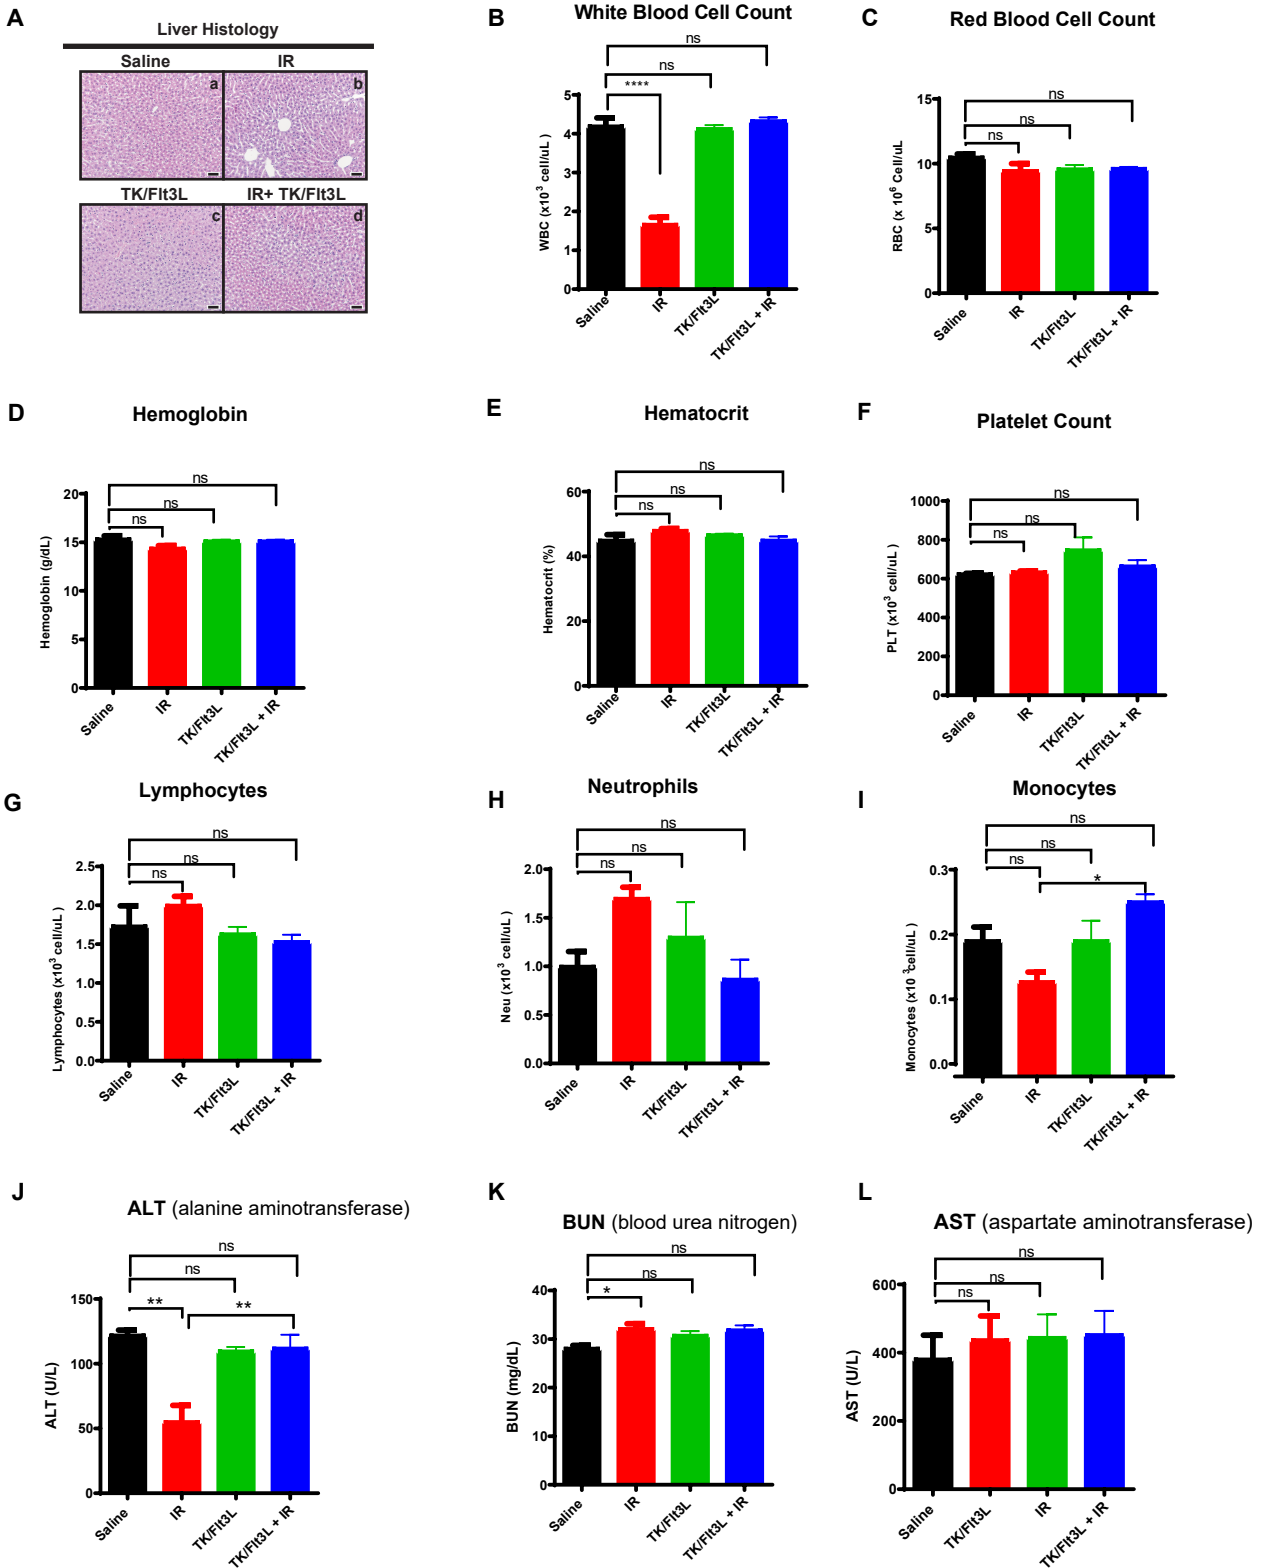

**Supplementary Figure S8:** (A) Mice bearing mACVR1 brainstem gliomas were treated with saline or TK/ FLT3L gene therapy on day 5 post tumor implantation, followed by intraperitoneal administration of GCV (25 mg/kg) on days 6-12. Radiation was administered 5 days' post tumor implantation at a dose of 2 Gy/Day for 10d with two days off in between the two five day cycles. Livers were processed for histology on day 23. Bright field images of paraffin embedded liver sections stained with H&E from animals that were treated with (a) saline, (b) IR, (c) Tk/Flt3L + GCV or (d) Tk/Flt3L + GCV+ IR. Scale bar = 50 μm. (B-L) Hematology and serum chemistry. Mice bearing mACVR1 brainstem gliomas were treated with saline or TK/FLT3L gene therapy on day 5 post tumor implantation, followed by intraperitoneal administration of GCV (25 mg/kg) on days 6-12. Radiation was administered at a dose of 2 Gy/Day for 10d with two days off in between 5 days' post tumor implantation. Blood and serum samples were drawn on day 23 to assess clinical parameters. (B) White blood cell (WBC), (C) red blood cell (RBC), (D) hemoglobin, (E) hematocrit, (F) Platelet (PLT), (G) Lymphocytes, (H) Neurotrophils (Neu), (I) Monocytes, (J) alanine aminotransferase (ALT), (K) blood urea nitrogen (BUN), (L) aspartate aminotransferase (AST).
