# Supplementary material
Source: PubMed Central journal article supplement (PMC7415674)
Supplement: NIHMS1588544-supplement-9.pdf [file NIHMS1588544-supplement-9.pdf]

**Supplementary Table 1. Antibodies**

| Analysis         | Antibody                                           | Company                  | Catalog number | Dilution |
|------------------|----------------------------------------------------|--------------------------|----------------|----------|
| IHC-DAB          | Rabbit polyclonal anti-OLIG2                       | Millipore Sigma          | AB9610         | 1:200    |
| IHC-DAB          | Rabbit polyclonal anti-GFAP                        | Millipore Sigma          | AB5804         | 1:1000   |
| IHC-DAB          | Chicken polyclonal nestin                          | Novus Biologicals        | NB100-1604     | 1:100    |
| IHC-DAB          | Rabbit polyclonal anti-SOX2                        | Abcam                    | ab97959        | 1:500    |
| IHC-DAB          | Rabbit Anti-Ki67                                   | Abcam                    | ab15580        | 1:100    |
| IHC-DAB          | Rabbit monoclonal anti-p-ERK1/2                    | Cell Signaling           | 4370           | 1:100    |
| IHC-DAB          | Rabbit polyclonal anti p-MEK-1/2                   | Santa Cruz Biotechnology | sc-7995-R      | 1:100    |
| WB               | Rabbit anti phospho Smad1/Smad5/Smad8 (Ser463/465) | Millipore Sigma          | AB3848-I       | 1:500    |
| IHC Fluorescence | Rabbit anti-phospho Smad1/Smad5/Smad8 (Ser463/465) | Millipore Sigma          | AB3848-I       | 1:50     |
| IHC DAB          | Rabbit Monoclonal Anti-Mouse Id1 antibody          | Biocheck                 | BCH-1/37-2     | 1:100    |
| WB               | Rabbit Monoclonal Anti-Mouse Id1 antibody          | Biocheck                 | BCH-1/37-2     | 1:500    |
| WB               | Rabbit Monoclonal Anti-Id2                         | Calbioreagents           | 9-2-8          | 1:500    |
| WB               | Mouse monoclonal anti- $\beta$ -actin              | Millipore Sigma          | A1978          | 1:10,000 |
| WB               | Rabbit polyclonal anti-Smad1                       | Abcam                    | ab63356        | 1:500    |
| WB               | Goat anti-rabbit                                   | Dako                     | P0448          | 1:4000   |
| WB               | rabbit anti-mouse                                  | Dako                     | P0260          | 1:20,000 |
| Flow cytometry   | Mouse monoclonal anti CD16/32                      | Biologend                | 101335         | 1:200    |
| Flow cytometry   | Mouse monoclonal anti CD45                         | Biologend                | 103125         | 1:200    |
| Flow cytometry   | Mouse monoclonal anti CD8                          | Biologend                | 100711         | 1:200    |
| Flow cytometry   | Mouse monoclonal anti CD3                          | Biologend                | 100333         | 1:200    |
| Flow cytometry   | SIINFEKL-H2Kb-tetramer-PE                          | MBL International        | TB-5001-1      | 1:200    |
| Flow cytometry   | IFN $\gamma$                                       | Biologend                | 113603         | 1:200    |
| Flow cytometry   | CD133                                              | Biologend                | 141203         | 1:200    |
| Flow cytometry   | CD44                                               | Biologend                | 103005         | 1:200    |
| Flow cytometry   | Aldh1                                              | R&D Systems              | AAF5869-SP     | 1:200    |
| IHC-DAB          | Vimentin                                           | Abcam                    | ab92547        | 1:500    |
| IHC-DAB          | IBA1                                               | Abcam                    | ab178846       | 1:1000   |
| IHC-DAB          | CD8                                                | Cederlane                | 361003(SY)     | 1:2000   |
