# Supplementary material
Source: PubMed Central journal article supplement (PMC7415674)

# Supplementary Fig S6

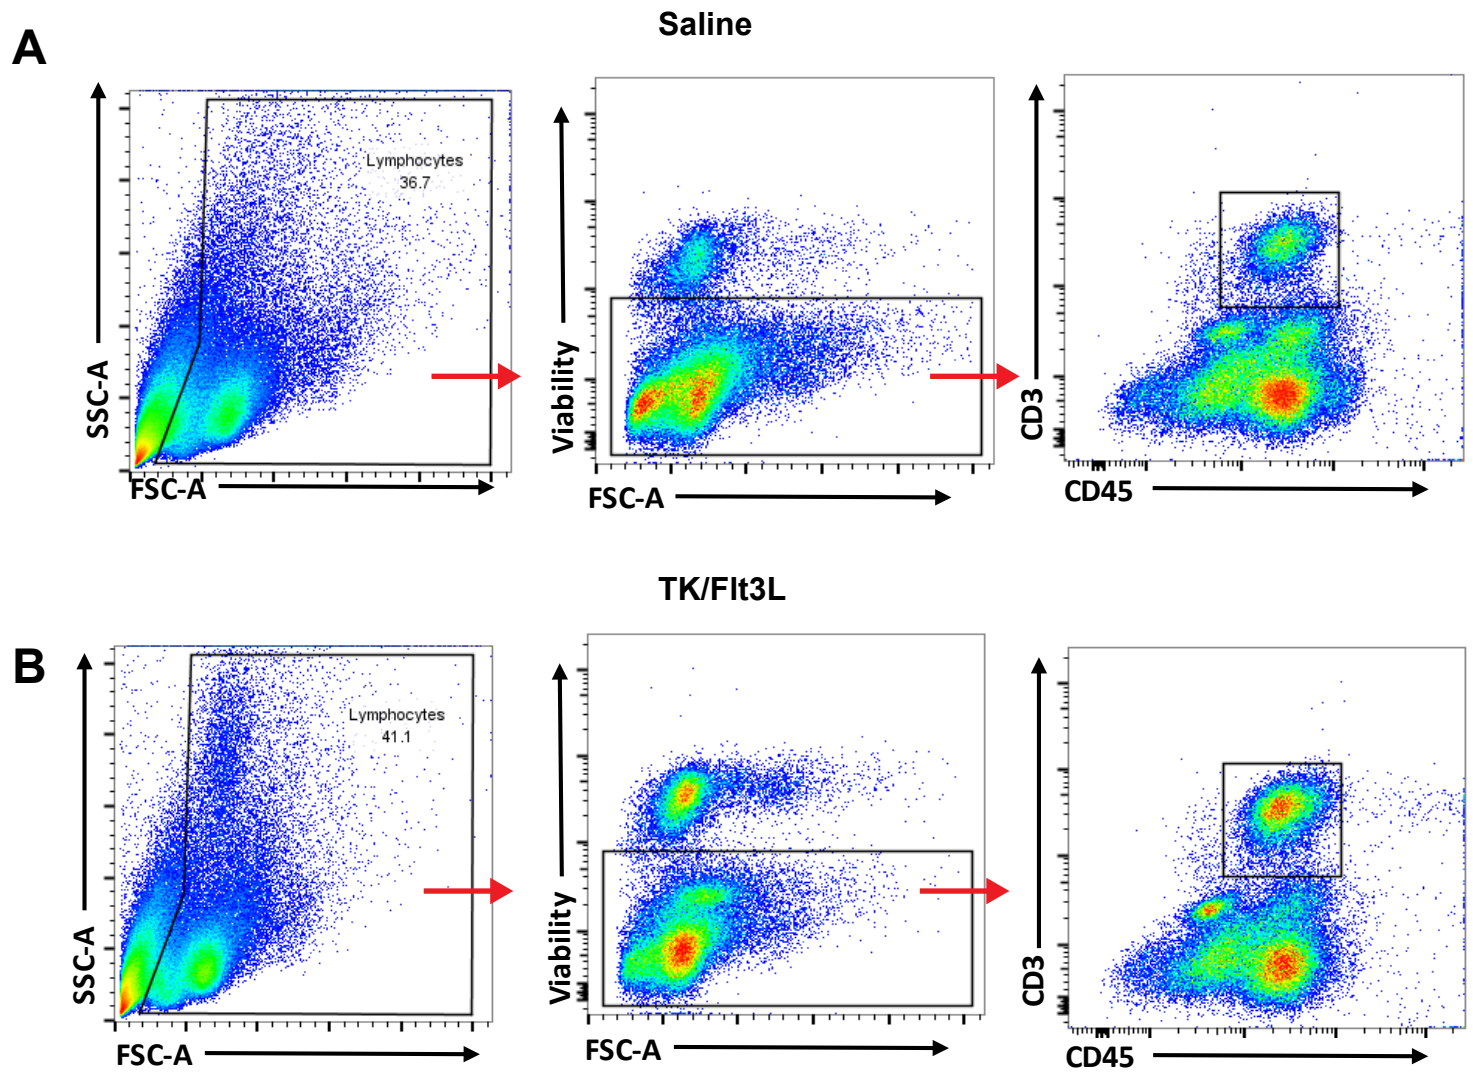

Supplementary Fig S6: Gating strategy for CD3+, CD45+ T cells in Figure 6.

Supplement: NIHMS1588544-supplement-6.pdf [file NIHMS1588544-supplement-6.pdf]
